# Supplementary material for: The Two Sexually Compatible Monokaryons from a Heterokaryotic <em>Lentinula edodes </em>Strain Respond Differently to Heat Stress
Source: Preprints.org preprint supplement (doi:10.20944/preprints202410.2126.v1), 2024-10-28
Supplement: Supplementary file 1 [file supplementary]

## Sheet: Sheet1
supplymentary table 8. The differentially expressed genes detected in the glycerophospholipid metabolism for SP3 and SP30 under heat stress.
SP3-HS VS SP3
Gene_id	Log2FC(HSSP3/SP3)	Padjust	Regulate	HSSP3_1	HSSP3_2	HSSP3_3	HSSP3_4	HSSP3_5	SP3_1	SP3_2	SP3_3	SP3_4	SP3_5	HSSP3	SP3	GO_term	Pathway_definition	EggNOG_id	EggNOG_Functional Categories	NR_hit-name	NR_description	Swiss-Prot_hit-name	Swiss-Prot_description	Pfam_id	Domain	Domain description
GWHGBGWX008569	-1.88423	0.00633897	down	0.47	0.59	0.47	0.66	1.22	7.54	2.29	1.94	0.76	1.9	0.682	2.886	BP:phospholipid biosynthetic process;MF:phosphatidylserine decarboxylase activity;	Glycerophospholipid metabolism	------	------	KAF8827293.1	hypothetical protein HHX47_DHR5000498 [Lentinula edodes]	sp|P0DPA6|PSID_PSICU;	L-tryptophan decarboxylase OS=Psilocybe cubensis OX=181762 GN=psiD PE=1 SV=1;	------	------	------
GWHPBGWX009210	-2.84484	0.000824191	down	0.64	0	1.03	0.19	0	2.36	3.6	2.98	3.55	1.98	0.372	2.894	BP:phosphatidylcholine biosynthetic process;BP:methylation;CC:integral component of membrane;CC:endoplasmic reticulum membrane;CC:mitochondrial membrane;MF:phosphatidyl-N-dimethylethanolamine N-methyltransferase activity;MF:phosphatidyl-N-methylethanolamine N-methyltransferase activity;	Glycerophospholipid metabolism	ENOG4111HY0	I:Lipid transport and metabolism	KAF8826287.1	hypothetical protein HHX47_DHR5000445 [Lentinula edodes]	sp|Q7S5W9|PLMT_NEUCR;	Phosphatidyl-N-methylethanolamine N-methyltransferase OS=Neurospora crassa;	PF04191.15	PEMT	Phospholipid methyltransferase
GWHGBGWX008406	2.69352	0.0186075	up	1.57	1.21	0.93	0.57	0.33	0.07	0.06	0	0.55	0	0.922	0.136	MF:hydrolase activity;	Glycerophospholipid metabolism	------	------	KAF8827174.1	hypothetical protein HHX47_DHR5001015 [Lentinula edodes]	sp|P0CL95|APTH1_CRYNB;	Acyl-protein thioesterase 1 OS=Cryptococcus neoformans var. neoformans serotype D;	------	------	------
SP30-HS VS SP30
Gene_id	Log2FC(HSSP30/SP30)	Padjust	Regulate	HSSP30_1	HSSP30_2	HSSP30_3	HSSP30_4	HSSP30_5	SP30_1	SP30_2	SP30_3	SP30_4	SP30_5	HSSP30	SP30	GO_term	Pathway_definition	EggNOG_id	EggNOG_Functional Categories	NR_hit-name	NR_description	Swiss-Prot_hit-name	Swiss-Prot_description	Pfam_id	Domain	Domain description
GWHGBGWX005671	-6.30982	0.012896	down	0	0	0	0	0	0.91	0	1.7	0.79	0	0	0.68	BP:CDP-diacylglycerol biosynthetic process;CC:integral component of membrane;MF:phosphatidate cytidylyltransferase activity;	Glycerophospholipid metabolism;Phosphatidylinositol signaling system	------	------	GAW05209.1	phosphatidate cytidylyltransferase [Lentinula edodes]	sp|Q9P381|CDSH_SCHPO;	Putative phosphatidate cytidylyltransferase OS=Schizosaccharomyces pombe;	------	------	------
GWHPBGWX007016	-6.30982	0.012896	down	0	0	0	0	0	0.91	0	1.7	0.79	0	0	0.68	BP:CDP-diacylglycerol biosynthetic process;CC:integral component of membrane;MF:phosphatidate cytidylyltransferase activity;	Glycerophospholipid metabolism;Phosphatidylinositol signaling system	------	------	GAW05209.1	phosphatidate cytidylyltransferase [Lentinula edodes]	sp|Q9P381|CDSH_SCHPO;	Putative phosphatidate cytidylyltransferase OS=Schizosaccharomyces pombe;	PF01148.22	CTP_transf_1	Cytidylyltransferase family
GWHGBGWX008569	-4.41406	2.93064e-06	down	0	0	0.24	0.15	0	2.14	0.92	4.53	1.54	1.68	0.078	2.162	BP:phospholipid biosynthetic process;MF:phosphatidylserine decarboxylase activity;	Glycerophospholipid metabolism	------	------	KAF8827293.1	hypothetical protein HHX47_DHR5000498 [Lentinula edodes]	sp|P0DPA6|PSID_PSICU;	L-tryptophan decarboxylase OS=Psilocybe cubensis OX=181762 GN=psiD PE=1 SV=1;	------	------	------
GWHPBGWX010544	6.09226	4.97557e-05	up	0.46	1.13	0.2	0.1	0.96	0.02	0	0	0	0	0.57	0.004	BP:phospholipid biosynthetic process;MF:phosphatidylserine decarboxylase activity;	Glycerophospholipid metabolism	------	------	GAW06449.1	phosphatidylserine decarboxylase [Lentinula edodes]	sp|P0DPA6|PSID_PSICU;	L-tryptophan decarboxylase OS=Psilocybe cubensis OX=181762 GN=psiD PE=1 SV=1;	PF02666.17;PF12588.10	PS_Dcarbxylase;PSDC	Phosphatidylserine decarboxylase;Phophatidylserine decarboxylase
GWHPBGWX010543	6.09226	4.97557e-05	up	0.46	1.13	0.2	0.1	0.96	0.02	0	0	0	0	0.57	0.004	BP:phospholipid biosynthetic process;MF:phosphatidylserine decarboxylase activity;	Glycerophospholipid metabolism	------	------	GAW06449.1	phosphatidylserine decarboxylase [Lentinula edodes]	sp|P0DPA6|PSID_PSICU;	L-tryptophan decarboxylase OS=Psilocybe cubensis OX=181762 GN=psiD PE=1 SV=1;	PF02666.17;PF12588.10	PS_Dcarbxylase;PSDC	Phosphatidylserine decarboxylase;Phophatidylserine decarboxylase
GWHPBGWX010652	-2.60512	6.31651e-11	down	0.39	0.55	0.32	0.26	0.31	4.05	1.8	5.93	3.4	3.36	0.366	3.708	BP:phospholipid biosynthetic process;MF:phosphatidylserine decarboxylase activity;	Glycerophospholipid metabolism	------	------	KAF8827293.1	hypothetical protein HHX47_DHR5000498 [Lentinula edodes]	sp|P0DPA6|PSID_PSICU;	L-tryptophan decarboxylase OS=Psilocybe cubensis OX=181762 GN=psiD PE=1 SV=1;	PF02666.17;PF12588.10	PS_Dcarbxylase;PSDC	Phosphatidylserine decarboxylase;Phophatidylserine decarboxylase
GWHPBGWX013573	4.64125	0.0446438	up	8.38	4.29	2.97	5.4	6.56	0	0	0	0	1.37	5.52	0.274	BP:methylation;BP:phosphatidylcholine biosynthetic process;CC:integral component of membrane;CC:endoplasmic reticulum membrane;MF:phosphatidylethanolamine N-methyltransferase activity;	Glycerophospholipid metabolism	------	------	KAF8824623.1	hypothetical protein HHX47_DHR8000026 [Lentinula edodes]	sp|B0D4E6|CHO2_LACBS;	Phosphatidylethanolamine N-methyltransferase OS=Laccaria bicolor;	PF04191.15	PEMT	Phospholipid methyltransferase
GWHGBGWX008406	3.37889	0.0184625	up	1.47	0.67	0.92	0.36	0.94	0	0	0	0.47	0	0.872	0.094	MF:hydrolase activity;	Glycerophospholipid metabolism	------	------	KAF8827174.1	hypothetical protein HHX47_DHR5001015 [Lentinula edodes]	sp|P0CL95|APTH1_CRYNB;	Acyl-protein thioesterase 1 OS=Cryptococcus neoformans var. neoformans serotype D;	------	------	------
GWHPBGWX010449	3.37889	0.0184625	up	1.47	0.67	0.92	0.36	0.94	0	0	0	0.47	0	0.872	0.094	MF:hydrolase activity;	Glycerophospholipid metabolism	------	------	KAF8827174.1	hypothetical protein HHX47_DHR5001015 [Lentinula edodes]	sp|P0CL95|APTH1_CRYNB;	Acyl-protein thioesterase 1 OS=Cryptococcus neoformans var. neoformans serotype D;	PF02230.18;PF12697.9	Abhydrolase_2;Abhydrolase_6	Phospholipase/Carboxylesterase;Alpha/beta hydrolase family
GWHGBGWX000326	-1.43562	1.08617e-05	down	3.76	7.24	5.9	6.94	6.02	13.08	21.26	39.56	18.02	12.22	5.972	20.828	BP:phospholipid catabolic process;CC:integral component of membrane;MF:lysophospholipase activity;MF:phosphatidyl phospholipase B activity;	Glycerophospholipid metabolism	------	------	KAF8831152.1	hypothetical protein HHX47_DHR1000082 [Lentinula edodes]	sp|B0Y665|PLB1_ASPFC;	Lysophospholipase 1 OS=Neosartorya fumigata;	------	------	------
